# Supplementary material for: Increased Risk for Respiratory Complications in Male Extremely Preterm Infants: A Propensity Score Matching Study
Source: PubMed Central journal article supplement (PMC9134850; doi:10.3389/fendo.2022.823707), 2022-05-12
Supplement: DataSheet_1.pdf [file DataSheet_1.pdf]

## Supplemental information

**Table 1 The Characteristics of BPD in EPIs born at  $\geq 27$  weeks of gestation after matching**

| Characteristic                              | Male (No.=37)    | Female (No.=42)   | <i>P</i> value     |
|---------------------------------------------|------------------|-------------------|--------------------|
| <b>Neonatal characteristic</b>              |                  |                   |                    |
| Gestational age, weeks                      | 27.6(27.1, 27.7) | 27.6 (27.1, 27.7) | 0.889              |
| Birth weight, g                             | 992 $\pm$ 173    | 994 $\pm$ 127     | 0.973              |
| WWLST, No. (%)                              | 1 (2.7)          | 1 (2.4)           | 1.000 <sup>a</sup> |
| Apgar score, No. (%)                        |                  |                   |                    |
| 1-min $\leq 3$                              | 1 (2.7)          | 2 (4.8)           | 1.000 <sup>a</sup> |
| 1-min 4~7                                   | 9 (24.3)         | 10 (23.8)         | 0.957              |
| 5-min $\leq 7$                              | 5 (13.5)         | 2 (4.8)           | 0.332 <sup>a</sup> |
| Mechanical ventilation, No. (%)             | 31 (83.8)        | 32 (76.2)         | 0.402              |
| Duration of mechanical ventilation , days   | 7.3 (3.0, 14.7)  | 4.4 (0.2, 7.2)    | 0.050              |
| <b>Maternal characteristic</b>              |                  |                   |                    |
| Age $\geq 35$ years, No. (%)                | 10 (27.0)        | 11 (26.2)         | 0.933              |
| Cesarean section, No. (%)                   | 16 (43.2)        | 16 (38.1)         | 0.642              |
| IVF, No. (%)                                | 7 (18.9)         | 13 (31.0)         | 0.220              |
| Twin/multiple pregnancy, No. (%)            | 8 (21.6)         | 9 (21.4)          | 0.983              |
| Any antenatal steroids, No. (%)             | 31 (83.8)        | 32 (76.2)         | 0.402              |
| Complete-course antenatal steroids, No. (%) | 21 (56.8)        | 16 (38.1)         | 0.097              |
| Placental abruption, No. (%)                | 3 (8.1)          | 4 (9.5)           | 1.000 <sup>a</sup> |
| Placenta previa, No. (%)                    | 2 (5.4)          | 2 (4.8)           | 1.000 <sup>a</sup> |
| Premature rupture of membranes, No. (%)     | 16 (43.2)        | 23 (54.8)         | 0.307              |
| Chorioamnionitis , No. (%)                  | 2 (5.4)          | 5 (11.9)          | 0.537 <sup>a</sup> |
| Intrauterine distress, No. (%)              | 3 (8.1)          | 3 (7.1)           | 1.000 <sup>a</sup> |
| Hypertensive disorder of pregnancy, No. (%) | 6 (16.2)         | 5 (11.9)          | 0.581              |
| Gestational diabetes mellitus, No. (%)      | 4 (10.8)         | 9 (21.4)          | 0.334 <sup>a</sup> |
| Cervical incompetence, No. (%)              | 7 (18.9)         | 5 (11.9)          | 0.386              |

Data are presented as median (IQR), mean  $\pm$  SD, or number (%); IVF, in vitro fertilization; <sup>a</sup> Continuity correction Chi-square tests; EPIs, extremely preterm infants; BPD, bronchopulmonary dysplasia; WWLST, withholding or withdrawing life-sustaining treatment .

**Table 2 The Characteristics of RDS in EPIs born at 750~999g of birth weight after matching**

| Characteristic                              | Male (No.=96)    | Female (No.=91)   | <i>P</i> value     |
|---------------------------------------------|------------------|-------------------|--------------------|
| <b>Neonatal characteristic</b>              |                  |                   |                    |
| Gestational age, weeks                      | 26.9(26.1, 27.3) | 26.6 (26.1, 27.3) | 0.714              |
| Birth weight, g                             | 915(856, 950)    | 875 (800, 930)    | <0.01              |
| WWLST, No. (%)                              | 37 (38.5)        | 36 (39.6)         | 0.886              |
| Apgar score, No. (%)                        |                  |                   |                    |
| 1-min ≤3                                    | 6 (6.3)          | 5 (5.5)           | 0.826              |
| 1-min 4~7                                   | 29 (30.2)        | 29 (31.9)         | 0.806              |
| 5-min ≤7                                    | 13 (13.5)        | 12 (13.2)         | 0.943              |
| Mechanical ventilation, No. (%)             | 75 (78.1)        | 65 (71.4)         | 0.291              |
| Duration of mechanical ventilation , days   | 3.9 (0.2, 12.9)  | 2.9 (0.0, 9.1)    | 0.236              |
| <b>Maternal characteristic</b>              |                  |                   |                    |
| Age ≥35 years, No. (%)                      | 24 (25.0)        | 23 (25.3)         | 0.965              |
| Cesarean section, No. (%)                   | 34 (35.4)        | 25 (27.5)         | 0.243              |
| IVF, No. (%)                                | 39 (40.6)        | 41 (45.1)         | 0.541              |
| Twin/multiple pregnancy, No. (%)            | 31 (32.3)        | 36 (39.6)         | 0.300              |
| Any antenatal steroids,No. (%)              | 68 (70.8)        | 58 (63.7)         | 0.301              |
| Complete-course antenatal steroids,No. (%)  | 40 (41.7)        | 36 (39.6)         | 0.769              |
| Placental abruption,No. (%)                 | 6 (6.3)          | 6 (6.6)           | 0.924              |
| Placenta previa, No. (%)                    | 5 (5.2)          | 7 (7.7)           | 0.488              |
| Premature rupture of membranes,No. (%)      | 36 (37.5)        | 29 (31.9)         | 0.419              |
| Chorioamnionitis , No. (%)                  | 8 (8.3)          | 8 (8.8)           | 0.911              |
| Intrauterine distress, No. (%)              | 5 (5.2)          | 3 (3.3)           | 0.776 <sup>a</sup> |
| Hypertensive disorder of pregnancy, No. (%) | 13 (13.5)        | 9 (9.9)           | 0.439              |
| Gestational diabetes mellitus, No. (%)      | 16 (16.7)        | 20 (22.0)         | 0.357              |
| Cervical incompetence, No. (%)              | 17 (17.7)        | 12 (13.2)         | 0.393              |

Data are presented as median (IQR), or number (%); IVF, in vitro fertilization; <sup>a</sup> Continuity correction Chi-square tests; EPIs, extremely preterm infants; RDS, respiratory distress syndrome; WWLST, withholding or withdrawing life-sustaining treatment .

**Table 3 The Characteristics of BPD in EPIs born at 750~999g of birth weight after matching**

| Characteristic                              | Male (No.=50)    | Female (No.=42)   | P value            |
|---------------------------------------------|------------------|-------------------|--------------------|
| <b>Neonatal characteristic</b>              |                  |                   |                    |
| Gestational age, weeks                      | 26.9(26.1, 27.4) | 26.9 (26.1, 27.6) | 0.534              |
| Birth weight, g                             | 920(854, 950)    | 908 (800, 951)    | 0.379              |
| WWLST, No. (%)                              | 1 (2.0)          | 1 (2.4)           | 1.000 <sup>a</sup> |
| Apgar score, No. (%)                        |                  |                   |                    |
| 1-min ≤3                                    | 1 (2.0)          | 2 (4.8)           | 0.878 <sup>a</sup> |
| 1-min 4~7                                   | 14 (28.0)        | 14 (33.3)         | 0.580              |
| 5-min ≤7                                    | 3 (6.0)          | 3 (7.1)           | 1.000 <sup>a</sup> |
| Mechanical ventilation, No. (%)             | 46 (92.0)        | 35 (83.3)         | 0.202              |
| Duration of mechanical ventilation , days   | 7.7 (3.1, 19.0)  | 5.8 (2.9, 20.0)   | 0.507              |
| <b>Maternal characteristic</b>              |                  |                   |                    |
| Age ≥35 years, No. (%)                      | 13 (26.0)        | 15 (35.7)         | 0.313              |
| Cesarean section, No. (%)                   | 20 (40.0)        | 14 (33.3)         | 0.509              |
| IVF, No. (%)                                | 26 (52.0)        | 19 (45.2)         | 0.518              |
| Twin/multiple pregnancy, No. (%)            | 15 (30.0)        | 13 (31.0)         | 0.921              |
| Any antenatal steroids, No. (%)             | 38 (76.0)        | 33 (78.6)         | 0.770              |
| Complete-course antenatal steroids, No. (%) | 26 (52.0)        | 18 (42.9)         | 0.382              |
| Placental abruption, No. (%)                | 2 (4.0)          | 5 (11.9)          | 0.303 <sup>a</sup> |
| Placenta previa, No. (%)                    | 3 (6.0)          | 3 (7.1)           | 1.000 <sup>a</sup> |
| Premature rupture of membranes, No. (%)     | 16 (32.0)        | 15 (35.7)         | 0.707              |
| Chorioamnionitis, No. (%)                   | 4 (8.0)          | 7 (16.7)          | 0.340 <sup>a</sup> |
| Intrauterine distress, No. (%)              | 4 (8.0)          | 2 (4.8)           | 0.839 <sup>a</sup> |
| Hypertensive disorder of pregnancy, No. (%) | 6 (12.0)         | 5 (11.9)          | 0.989              |
| Gestational diabetes mellitus, No. (%)      | 6 (12.0)         | 12 (28.6)         | 0.046              |
| Cervical incompetence, No. (%)              | 12 (24.0)        | 9 (21.4)          | 0.770              |

Data are presented as median (IQR), or number (%); IVF, in vitro fertilization; <sup>a</sup> Continuity correction Chi-square tests; EPIs, extremely preterm infants; BPD, bronchopulmonary dysplasia; WWLST, withholding or withdrawing life-sustaining treatment .

**Table 4 The effects of gestational age on the incidence of respiratory complications in male and female**

| <b>EPIs after matching(%[diagnosed No./assessed No.]</b> |                      |                        |                    |
|----------------------------------------------------------|----------------------|------------------------|--------------------|
| <b>Gestational age at delivery(weeks)</b>                | <b>Male(No.=148)</b> | <b>Female(No.=148)</b> | <b>P value</b>     |
| <b>RDS</b>                                               |                      |                        |                    |
| <27                                                      | 97.6(83/85)          | 91.6(76/83)            | 0.159 <sup>a</sup> |
| ≥27                                                      | 96.8(61/63)          | 90.8(59/65)            | 0.294 <sup>a</sup> |
| <b>BPD</b>                                               |                      |                        |                    |
| <27                                                      | 100.0(41/41)         | 93.1(27/29)            | 0.168 <sup>b</sup> |
| ≥27                                                      | 94.6(35/37)          | 76.2(32/42)            | <0.05 <sup>a</sup> |
| <b>Moderate to severe BPD</b>                            |                      |                        |                    |
| <27                                                      | 56.1(23/41)          | 41.4(12/29)            | 0.225              |
| ≥27                                                      | 40.5(15/37)          | 14.3(6/42)             | <0.01              |

<sup>a</sup> Continuity correction Chi-square tests; <sup>b</sup>Fisher's exact tests; EPIs, extremely preterm infants; RDS, respiratory distress syndrome; BPD, bronchopulmonary dysplasia.

**Table 5 The effects of birth weight on the incidence of respiratory complications in male and female EPIs after matching(%[diagnosed No./assessed No.]**

| <b>after matching(%[diagnosed No./assessed No.]</b> |                      |                        |                    |
|-----------------------------------------------------|----------------------|------------------------|--------------------|
| <b>Birth weight at delivery(g)</b>                  | <b>Male(No.=148)</b> | <b>Female(No.=148)</b> | <b>P value</b>     |
| <b>RDS</b>                                          |                      |                        |                    |
| <900                                                | 98.4(62/63)          | 94.7(72/76)            | 0.483 <sup>a</sup> |
| ≥900                                                | 96.5(82/85)          | 87.5(63/72)            | 0.071 <sup>a</sup> |
| <b>BPD</b>                                          |                      |                        |                    |
| <900                                                | 96.4(27/28)          | 88.5(23/26)            | 0.551 <sup>a</sup> |
| ≥900                                                | 98.0(49/50)          | 80.0(36/45)            | 0.012 <sup>a</sup> |
| <b>Moderate to severe BPD</b>                       |                      |                        |                    |
| <900                                                | 57.1(16/28)          | 38.5(10/26)            | 0.170              |
| ≥900                                                | 44.0(22/50)          | 17.8(8/45)             | <0.01              |

<sup>a</sup> Continuity correction Chi-square tests; EPIs, extremely preterm infants; RDS, respiratory distress syndrome; BPD, bronchopulmonary dysplasia.
